# Supplementary material
Source: publisher figshare collection journal article supplement (https://brill.figshare.com/articles/dataset/_/22692226)
Supplement: Supplementary file 1 [file 1]

## **High degree of independence in the feeding apparatus of planarian flatworms**

*Ming-Qi Wu\** | ORCID: 0000-0002-2953-6832

Shenzhen Key Laboratory of Marine Bioresource and Eco-environmental  
Science, Guangdong Engineering Research Center for Marine Algal  
Biotechnology, College of Life Sciences and Oceanography, Shenzhen  
University, Shenzhen 518060, China

*Hai-Long Liu\** | ORCID: 0009-0008-4677-0568

Shenzhen Key Laboratory of Marine Bioresource and Eco-environmental  
Science, Guangdong Engineering Research Center for Marine Algal  
Biotechnology, College of Life Sciences and Oceanography, Shenzhen  
University, Shenzhen 518060, China

*Meng-Yu Xia* | ORCID: 0000-0001-8766-6232

Shenzhen Key Laboratory of Marine Bioresource and Eco-environmental  
Science, Guangdong Engineering Research Center for Marine Algal  
Biotechnology, College of Life Sciences and Oceanography, Shenzhen  
University, Shenzhen 518060, China

*Yu Zhang* | ORCID: 0000-0001-7378-6946

Shenzhen Key Laboratory of Marine Bioresource and Eco-environmental  
Science, Guangdong Engineering Research Center for Marine Algal  
Biotechnology, College of Life Sciences and Oceanography, Shenzhen  
University, Shenzhen 518060, China

*biozy@szu.edu.cn*

*Ronald Sluys* | ORCID: 0000-0002-9776-3471

Naturalis Biodiversity Center, P.O. Box 9517, 2300, RA Leiden, The Netherlands

*ronald.sluys@naturalis.nl*

*An-Tai Wang* | ORCID: 0000-0003-4222-9535

Shenzhen Key Laboratory of Marine Bioresource and Eco-environmental  
Science, Guangdong Engineering Research Center for Marine Algal  
Biotechnology, College of Life Sciences and Oceanography, Shenzhen  
University, Shenzhen 518060, China

\*These authors contributed equally to this work

## **Supplementary material**

VIDEO S1 Feeding of *Paucumara falcata* (intact animal).

VIDEO S2 Feeding of *Paucumara falcata* (isolated pharynx).
